# Supplementary material for: Metabolic pathways engaged by antigen-specific T and B cells after SARS-CoV-2 vaccination in multiple sclerosis patients on different immunomodulatory drugs reveal immunosenescence and predict vaccine efficacy.
Source: Research Square preprint supplement (doi:10.21203/rs.3.rs-3604561/v1), 2023-11-17
Supplement: Supplementary file 1 [file b12d3dfbe4066a8c74389ac0.xlsx]

## Sheet: Foglio1
Study population (N = 106)	HD (N = 13)	CLADRIBINE (N = 6)	DMF (N = 18)	DMF LYMPHO (N = 10)	FTY (N = 14)	IFN (N = 12)	NATALIZUMAB (N = 15)	TERIFLUNOMIDE (N = 8)	aCD20 (N = 10)
Age, median (IQR), y	44.0 (35.0-57.0)	45.0 (43.3-50.5)	41.5 (34.0-46.8)	48.5 (47.0-50.5)	43.0 (40.3-50.1)	50.5 (47.8-54.5)	38.0 (30.0-49.5)	51.5 (47.0-58.0)	34.0 (29.5-38.0)
Females, n (%)	10.0 (76.9)	4.0 (66.7)	13.0 (72.2)	8.0 (80.0)	10.0 (71.4)	8.0 (66.7)	12.0 (80.0)	5.0 (62.5)	6.0 (60.0)
Disease duration, median (IQR), y	─	17.5 (15.0-21.5)	5.5 (3.0-18.5)	7.0 (6.0-17.2)	16.5 (11.3-22.5)	17.5 (11.5-19.0)	12.0 (4.5-19.5)	17.0 (14.5-25.0)	11.0 (10.0-12.5)
Disability by EDSS score, median (IQR)	─	2.0 (0.5-2.8)	1.0 (0.3-2.0)	1.0 (0.0-1.0)	2.0 (1.1-3.3)	1.0 (0.0-1.8)	2.0 (1.0-3.0)	2.0 (1.0-2.7)	2.5 (1.0-4.3)
Time from last treatment starts, median (IQR), y	─	1.3 (1.0-2.7)	2.8 (2.0-4.9)	3.5 (2.5-4.8)	7.4 (6.0-8.0)	6.6 (4.3-9.1)	5.9 (1.4-9.1)	3.1 (2.3-5.9)	2.7 (1.6-4.1)
Time from last infusion to last vaccination, median (IQR), months	─	NA	NA	NA	NA	NA	1.0 (0.5-1.7)	NA	4.9 (4.2-5.2)
Absolute lymphocyte count, median (IQR), 103cells/mm3	1.9 (1.6-2.2)	1.1 (0.7-1.7)	1.5 (1.2-1.9)	0.9 (0.8-0.9)	0.8 (0.5-0.9)	1.6 (1.3-1.9)	3.0 (2.6-4.1)	2.1 (1.8-2.2)	1.6 (1.4-2.1)
CD19 B-cell count, median (IQR), n/mm3	NA	101.0 (97.0-142.0)	NA	NA	36.0 (28.0-40.0)	NA	NA	NA	9.5 (3.8-21.3)
Breakthrough COVID-19 after full vaccination, n (%)	4.0 (13.3)	0 (0.0)	3.0 (16.7)	2.0 (20.0)	3.0 (21.4)	1.0 (8.3)	4.0 (26.7)	0 (0.0)	1.0 (10.0)
SARS-CoV-2 IgGII titer after full vaccination, AU/mL
Median (IQR)	12,288.5 (5,85.0-28,306.0)	4,666.1 (3,386.2-8,641.6)	14,804.3 (7,892.6-40,000.0)	12,763.2 (4,960.9-17,160.0)	1,958.0 (106.2-7,777.3)	11,277.7 (8,405.0-22,383.9)	6,058.2 (1,163.8-11,091.7)	9,812.0 (1,605.8-19,784.8)	95.5 (31.8-3,973.4)
SARS-CoV-2 RBD IgG titer after full vaccination, AU/mL
Median (IQR)	8,237.2 (5,275.8-13,011.2)	2,798.8 (1,668.3-4,417.1)	7,160.0(5,201.2-17,953.5)	10,204.3 (3,967.3-14,666.8)	1,764.2 (63.5-6,542.3)	7,124.1 (4,974.9-20,010.2)	4,964.8 (1,183.1-9,854.2)	4,552.8 (732.3-10,868.5)	65.8 (4.0-3,580.0)
Time from first vaccination to sampling, median (IQR), months	12.0 (9.0-15.1)	13.2 (10.2-15.9)	13.2 (9.6-15.6)	11.5 (10.3-13.0)	11.5 (10.3-13.0)	11.6 (10.3-12.7)	14.1 (9.5-15.5)	12.8 (11.2-14.2)	11.8 (10.0-15.5)
Time from last vaccination to sampling, median (IQR), months	3.5 (1.8-6.1)	4.8 (2.5-8.3)	5.8 (2.1-8.2)	3.9 (2.6-5.0)	3.9 (2.6-5.0)	3.5 (2.1-5.0)	5.5 (1.9-6.7)	5.4 (4.1-6.9)	2.4 (1.7-6.0)
Type of third vaccine dose
BNT162b2, n (%)	8.0 (61.5)	3.0 (50.0)	11.0 (61.1)	5.0 (50.0)	8.0 (57.1)	6.0 (50.0)	14.0 (93.3)	5.0 (62.5)	8.0 (80.0)
mRNA-1273, n (%)	5.0 (38.5)	3.0 (50.0)	7.0 (38.9)	5.0 (50.0)	6.0 (42.9)	6.0 (50.0)	1.0 (6.7)	3.0 (37.5)	2.0 (20.0)
HD, healthy controls; Cladribine; DMF, Dimethyl Fumarate; DMF Lympho, Dimethyl Fumarate Lymphopenic; FTY, Fingolimod; IFN, interferon; Natalizumab; Teriflunomide; aCD20 (Ocrelizumab; Rituximab); IQR interquartile range; AU, arbitrary unit.
